# Supplementary material for: A high humidity-resistive triboelectric nanogeneratorviacoupling of dielectric material selection and surface-charge engineering
Source: Royal Society of Chemistry journal article supplement (doi:10.1039/d1ta05694h), 2021-01-01
Supplement: d1ta05694h3.pdf [file d1ta05694h3.pdf]

## Supporting Information

### High Humidity-Resistive Triboelectric Nanogenerator via Coupling of Dielectric Materials Selection and Surface-Charge Engineering

Lu Liu,<sup>a,b</sup> Linglin Zhou,<sup>a,b</sup> Chuguo Zhang,<sup>a,b</sup> Zhihao Zhao,<sup>a,b</sup> Shaoxin Li,<sup>a,b</sup> Xinyuan Li,<sup>a,b</sup>  
Xing Yin,<sup>a,b</sup> Jie Wang\*<sup>a,b,c</sup> and Zhong Lin Wang\*<sup>a,b,d</sup>

<sup>a</sup> Beijing Institute of Nanoenergy and Nanosystems, Chinese Academy of Sciences,  
Beijing 101400, P. R. China

<sup>b</sup> School of Nanoscience and Technology, University of Chinese Academy of  
Sciences, Beijing 100049, P. R. China

<sup>c</sup> School of Chemistry and Chemical Engineering, Center on Nanoenergy Research,  
Guangxi University, Nanning 530004, P. R. China

<sup>d</sup> School of Materials Science and Engineering, Georgia Institute of Technology,  
Atlanta, GA 30332, USA

\*Corresponding Author: J. Wang: [wangjie@binn.cas.cn](mailto:wangjie@binn.cas.cn); Z. L. Wang:  
[zhong.wang@mse.gatech.edu](mailto:zhong.wang@mse.gatech.edu)

## Supporting Figures

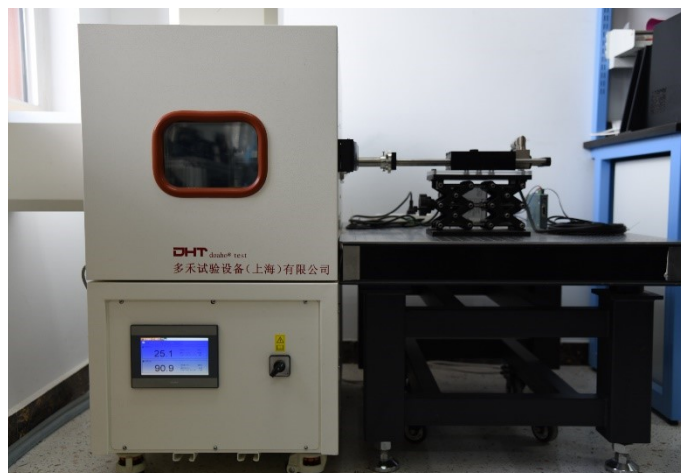

**Fig. S1** Photograph of the measurement system.

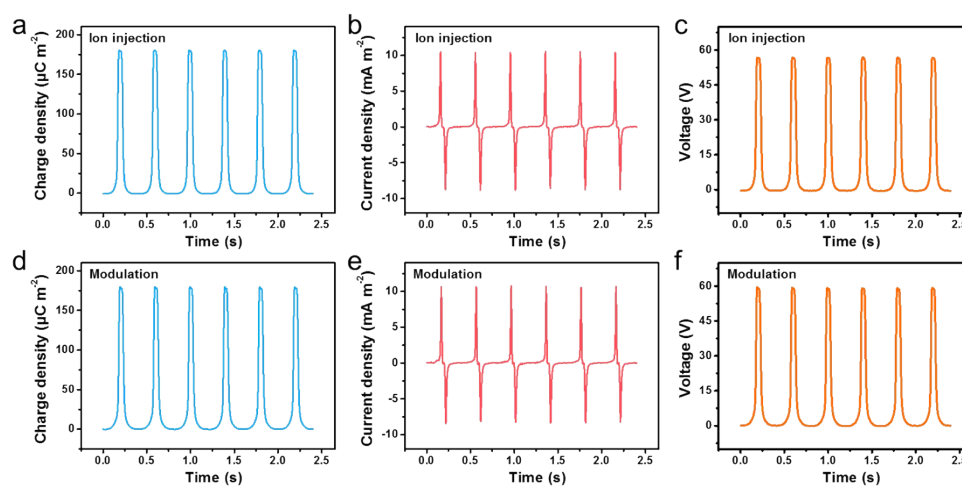

**Fig. S2** Output performance of TENG through ion injection and modulation method. a) Charge density, b) current density and c) open-circuit voltage of the TENG device after ion injection applied on the PTFE film with a thickness of  $100\ \mu\text{m}$ . d) Charge density, e) current density and f) open-circuit voltage of the TENG device after modulation applied on the PTFE film with a thickness of  $100\ \mu\text{m}$ .

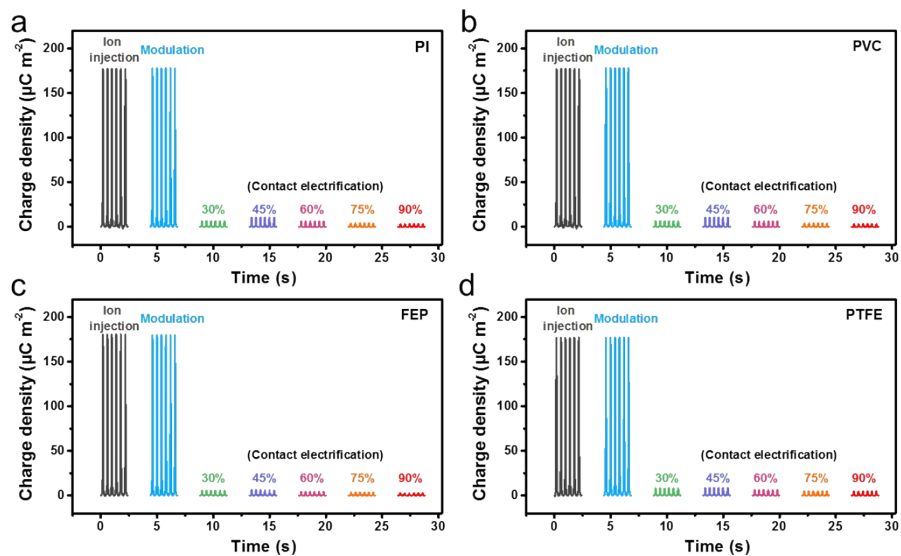

**Fig. S3** The charge density on the a) PI, b) PVC, c) FEP, and d) PTFE surfaces generated by ion injection, modulation and contact electrification strategy.

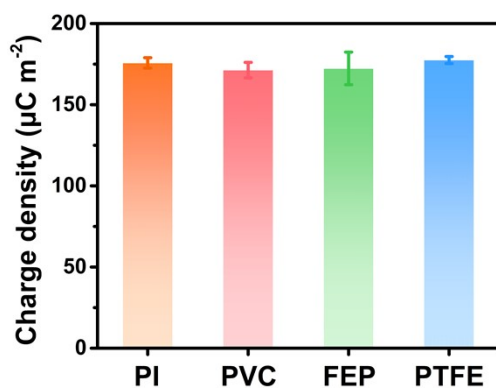

**Fig. S4** Initial charge density on the PI, PVC, FEP, and PTFE surfaces introduced through ion injection.

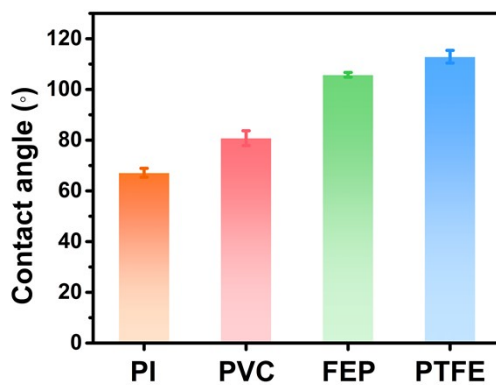

**Fig. S5** The contact angles of PI, PVC, FEP, and PTFE surfaces.

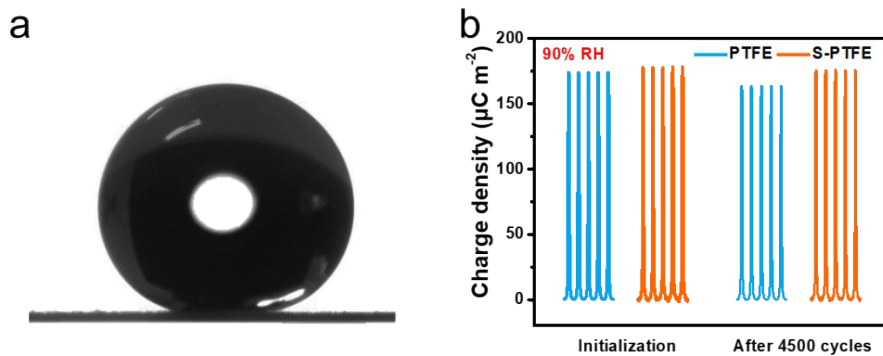

**Fig. S6** The performance comparison of PTFE and S-PTFE film based TENG under high humidity environment. a) The water contact angle of S-PTFE film. b) The residual surface charges of PTFE and S-PTFE film before and after 4500 cycles continuous operation under 90% RH.

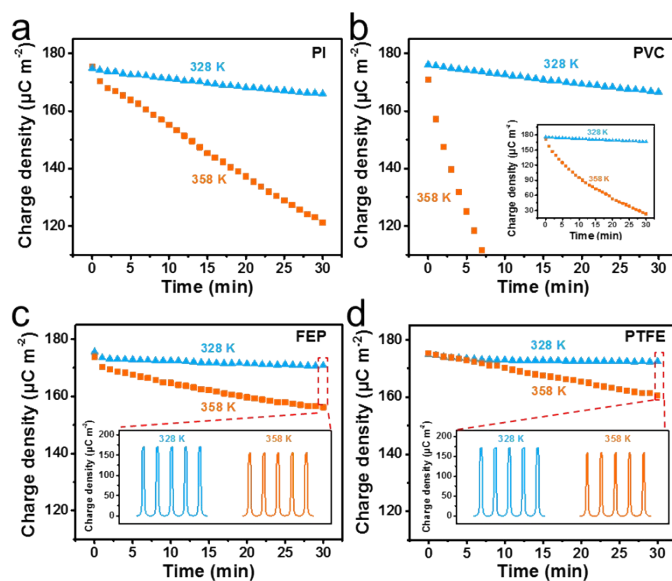

**Fig. S7** Effect of temperature on the surface charges. The charge decay on the a) PI, b) PVC, c) FEP, and d) PTFE surfaces under different temperatures.

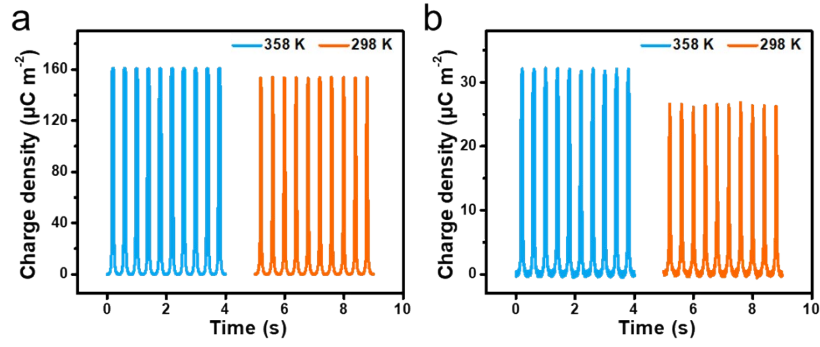

**Fig. S8** The charge density introduced through ion injection and modulation approach on the PTFE surface when the temperature drops back to 298 K.

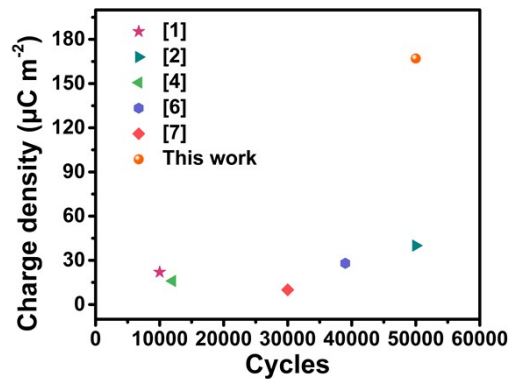

**Fig. S9** Comparisons of the output performance of reported high humidity-resistant TENG.

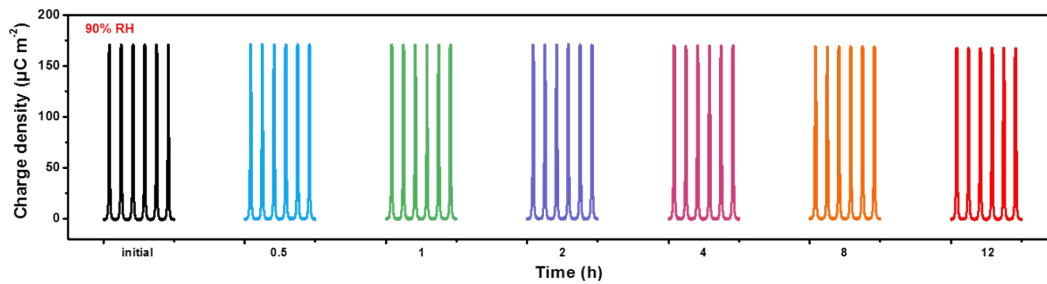

**Fig. S10** Stability test of the TENG device based on ion-injected PTFE film in 90% RH over 12 hours.

## Supplementary Notes

**Note S1.** Calculation of the equivalent charging current.

The equivalent charging current ( $I_{ec}$ ) is calculated by the following equation:

$$I_{ec} = C \times \Delta V / \Delta t \quad (1)$$

where  $C$  denotes the capacitance of the capacitor, and  $\Delta V$  denotes the voltage change of the capacitor during the charging/discharging time ( $\Delta t$ ).

## Supplementary Tables

**Table S1.** Comparisons of the output performance of TENG based on the ion-injected PTFE film with the previous classic works.

| Type of TENG                             | Surface charge density   | Relative humidity | Output stability | References |
|------------------------------------------|--------------------------|-------------------|------------------|------------|
| Fluorinated polymer sponge based TENG    | 22 $\mu\text{C m}^{-2}$  | 85%               | 10, 000 cycles   | 1          |
| Hydrophobic ionic liquid gel based TENG  | 40 $\mu\text{C m}^{-2}$  | 80%               | 50, 000 cycles   | 2          |
| Porous wood based TENG                   | 10 $\mu\text{C m}^{-2}$  | 75%               | /                | 3          |
| Nanofibrous membranes based TENG         | 16 $\mu\text{C m}^{-2}$  | 90%               | 12, 000 cycles   | 4          |
| Encapsulated porous cellulose based TENG | /                        | 80%               | 10, 800 cycles   | 5          |
| Starch films based TENG                  | 28 $\mu\text{C m}^{-2}$  | 95%               | 39, 000 cycles   | 6          |
| Cellulose Based TENG                     | 10 $\mu\text{C m}^{-2}$  | 84%               | 30, 900 cycles   | 7          |
| Packed TENG                              | 22 $\mu\text{C m}^{-2}$  | 90%               | /                | 8          |
| Textile based TENG                       | 42 $\mu\text{C m}^{-2}$  | 80%               | /                | 9          |
| Cellulose nanofibrils based TENG         | /                        | 90%               | 10, 000 cycles   | 10         |
| Ion-injected PTFE film based TENG        | 167 $\mu\text{C m}^{-2}$ | 90%               | 50, 000 cycles   | This work  |

## References

1. Z. Peng, J. Song, Y. Gao, J. Liu, C. Lee, G. Chen, Z. Wang, J. Chen and M. K. H. Leung, *Nano Energy*, 2021, **85**, 106021.
2. P. Lv, L. Shi, C. Fan, Y. Gao, A. Yang, X. Wang, S. Ding and M. Rong, *ACS Appl. Mater. Interfaces*, 2020, **12**, 15012-15022
3. C. Cai, J. Mo, Y. Lu, N. Zhang, Z. Wu, S. Wang and S. Nie, *Nano Energy*, 2021, **83**, 105833.
4. J. Shen, Z. Li, J. Yu and B. Ding, *Nano Energy*, 2017, **40**, 282-288.
5. S. Adonijah Graham, B. Dudem, H. Patnam, A. R. Mule and J. S. Yu, *ACS Energy Lett.*, 2020, **5**, 2140-2148.
6. N. Wang, Y. Zheng, Y. Feng, F. Zhou and D. Wang, *Nano Energy*, 2020, **77**, 105088
7. R. Zhang, C. Dahlström, H. Zou, J. Jonzon, M. Hummelgård, J. Örtengren, N. Blomquist, Y. Yang, H. Andersson and M. Olsen, *Adv. Mater.*, 2020, **32**, 2002824.
8. A. Chandrasekhar, V. Vivekananthan, G. Khandelwal and S. J. Kim, *Nano Energy*, 2019, **60**, 850-856.
9. Y.-T. Jao, P.-K. Yang, C.-M. Chiu, Y.-J. Lin, S.-W. Chen, D. Choi and Z.-H. Lin, *Nano Energy*, 2018, **50**, 513-520.
10. S. Nie, Q. Fu, X. Lin, C. Zhang, Y. Lu and S. Wang, *Chem. Eng. J.*, 2021, **404**, 126512.
